# Supplementary figures and images for: The Ku subunit of telomerase binds Sir4 to recruit telomerase to lengthen telomeres in S. cerevisiae
Source: eLife journal article supplement (doi:10.7554/elife.07750), 2015-07-28

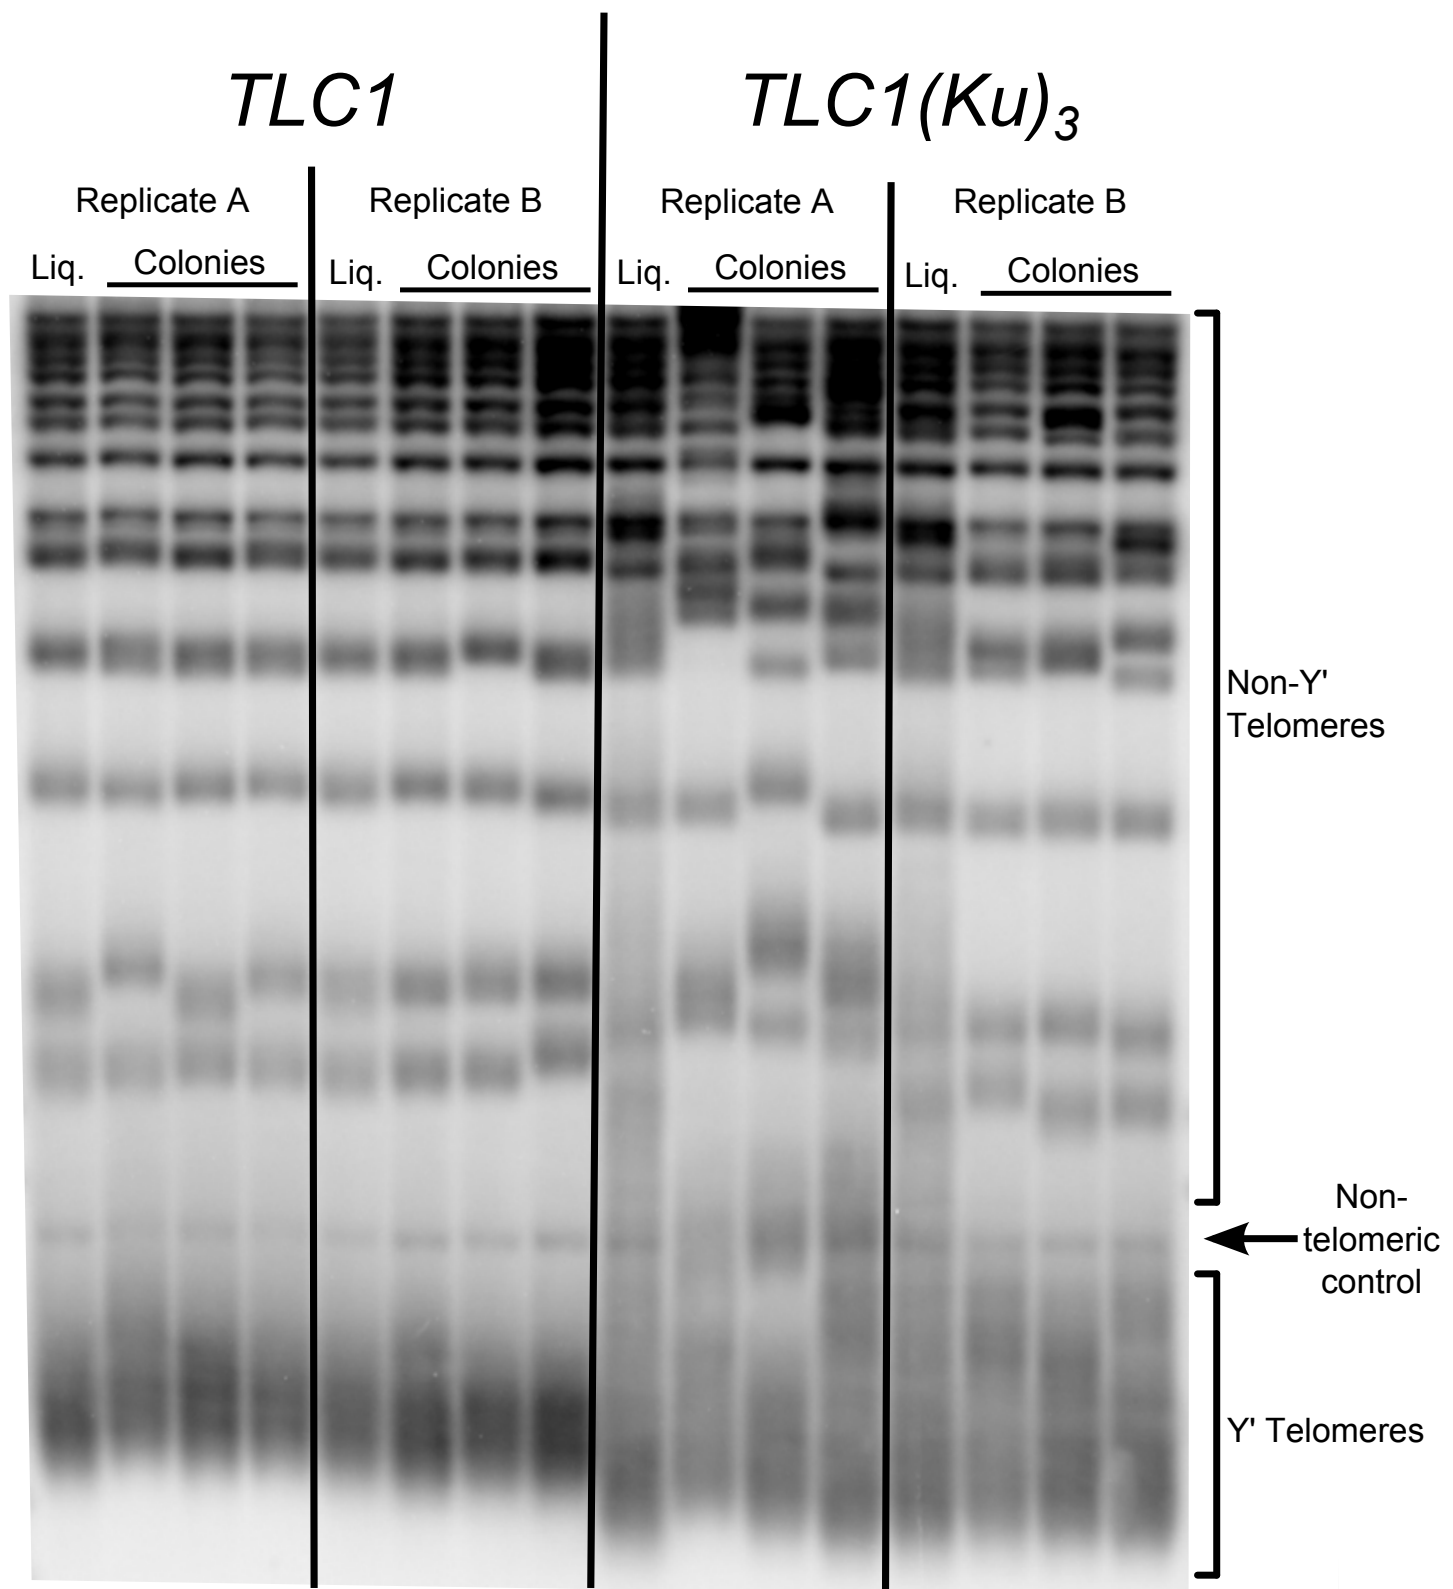

Supplement: supp [file elife-07750-supp-v1.zip]

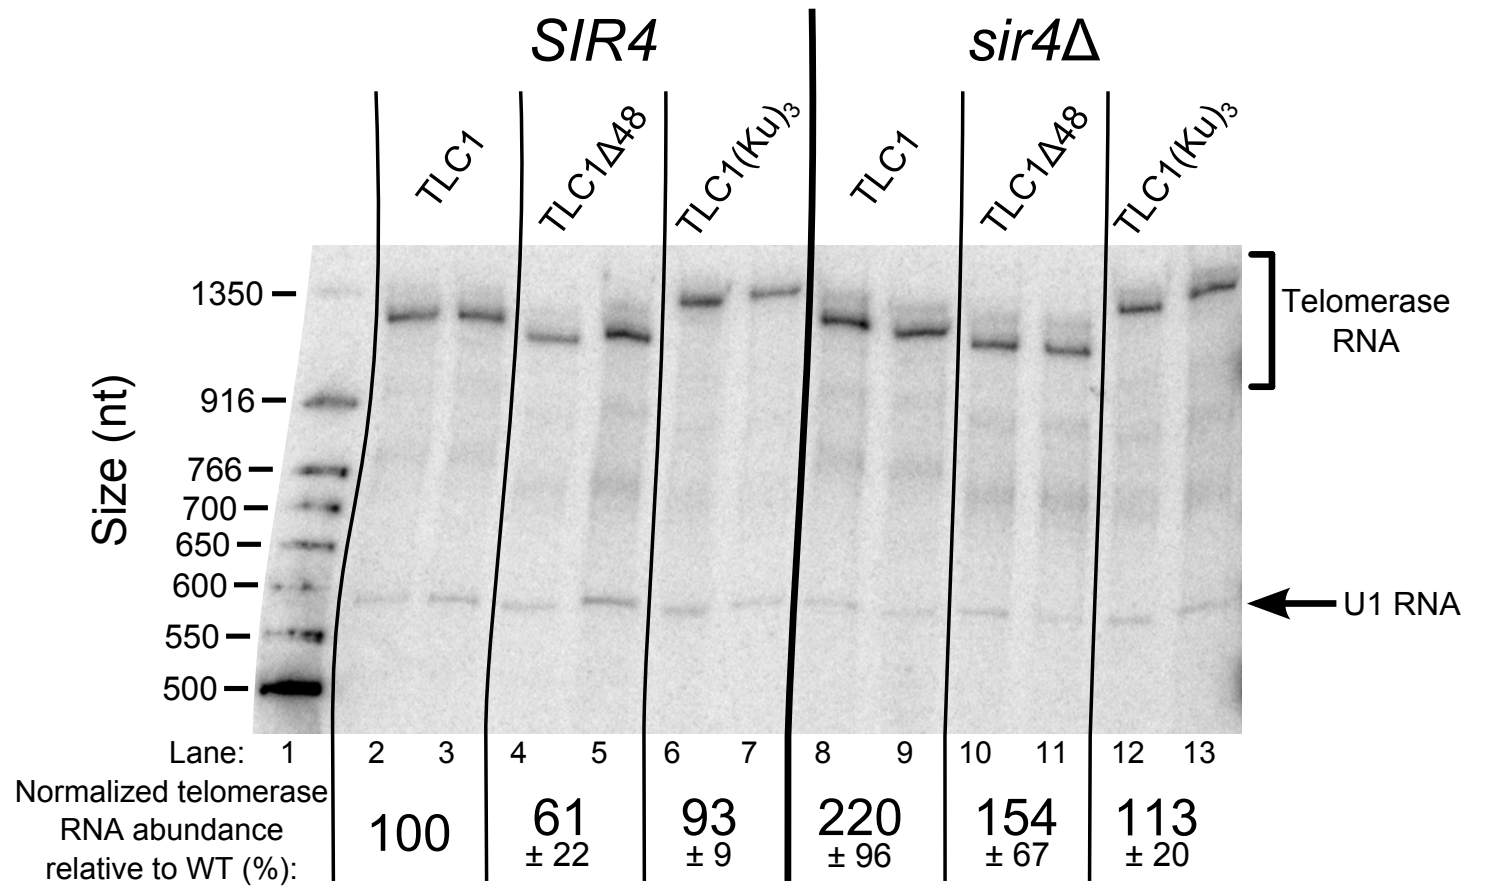

Supplement: supp [file elife-07750-supp-v1.zip]

A

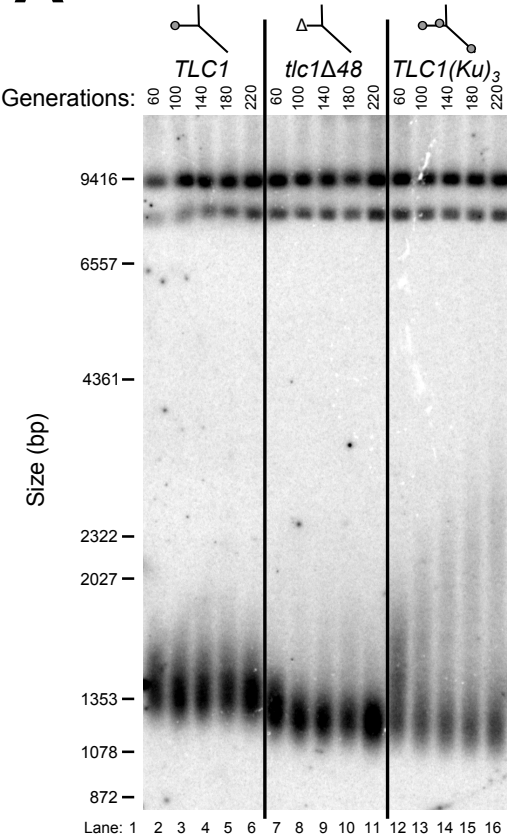

B

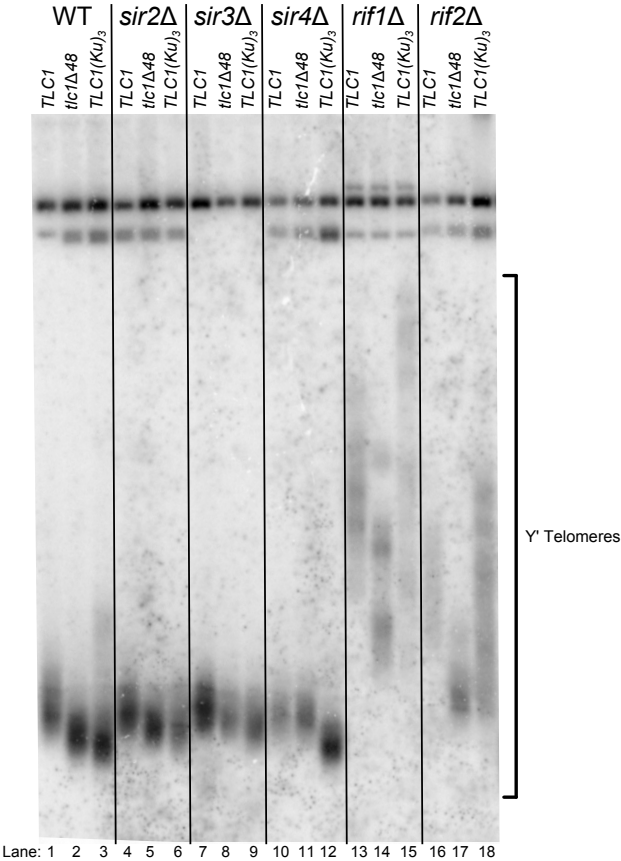

Supplement: supp [file elife-07750-supp-v1.zip]
